# Supplementary material for: Facile surface engineering of bio-waste derived amorphous carbon with SnO2 nanowires to enhance the efficacy of Li/Na storage
Source: Royal Society of Chemistry journal article supplement (doi:10.1039/d1ya00021g), 2022-01-01
Supplement: d1ya00021g1.pdf [file d1ya00021g1.pdf]

**Supporting Information**  
**Facile Surface Engineering of Bio-Waste Derived Amorphous Carbon with**  
**SnO<sub>2</sub> Nanowires to Enhance the Efficacy of Li/Na Storage**

S. Praveen Kumar, Balla Rekha Madhuri, Katchala Nanaji, Srinivasan Anandan, Tata Narasinga Rao and Ramkrishna Sahoo\*

Centre for Nanomaterials, International Advanced Research Centre for Powder Metallurgy and New Materials (ARCI), Hyderabad-500005, Telangana, India.

Corresponding Author: [ramkrishna.s@project.arci.res.in](mailto:ramkrishna.s@project.arci.res.in) (Dr. Ramkrishna Sahoo)

**Physical Characterization:**

X-ray diffraction (XRD) data for all the synthesized samples were performed using Bruker AX D8 with Cu K<sub>α</sub> radiation ( $\lambda = 1.5405 \text{ \AA}$ ). Field-emission scanning electron microscope (FESEM) was carried out using Zeiss, Gemini-SEM 500 equipped with energy dispersive spectroscopy (EDS) detector (Octane elite plus, EDAX). X-ray photoelectron spectroscopy was performed by ESCA-Omicron XPS system with Mg K $\alpha$  as the excitation source. BET surface area and BJH adsorption-desorption study of the samples were carried out by Micromeritics ASAP 2020 analyzer where degassing performed at 250 °C for 6 h before the measurements.

### Physicochemical characterization:

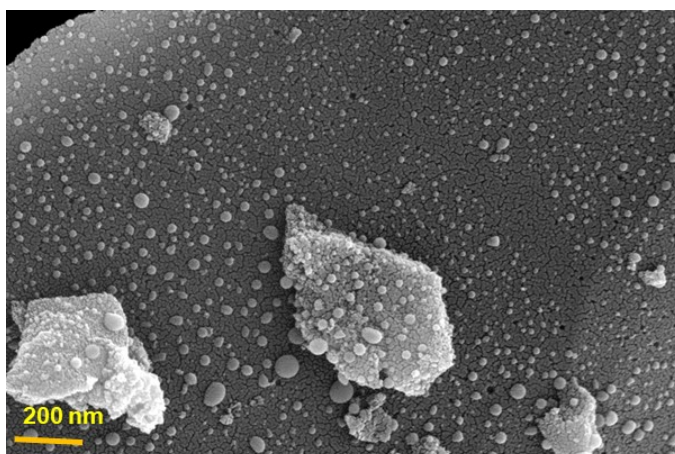

**Fig. S1:** FESEM image of the Carbon-SnO<sub>2</sub> physical mixture (P-C/SnO<sub>2</sub>)

In Figure S2B, it can be seen that the NAC exhibits two distinct peaks, at 1335 cm<sup>-1</sup> and 1588 cm<sup>-1</sup> which defines the D band (attributes to the state of disorder in the carbon structure) and G band (signifies the in-plane vibration of the carbon atoms). Here it can be seen that the I<sub>D</sub>/I<sub>G</sub> ratio for NAC is 1.02 that signifies the disordered type of the as-prepared carbon. The I<sub>D</sub>/I<sub>G</sub> ratio increases to 1.1 in case of the C/SnO<sub>2</sub> composite representing the enhancement in the state of disorder in the carbon of the C/SnO<sub>2</sub> composite. Figure S2C and D depict the nitrogen adsorption-desorption isotherm curves for NAC and C/SnO<sub>2</sub> composite, respectively. The pattern of the isotherms for both samples follow mixed nature of type I (acute raise in nitrogen adsorption at <0.3 P/P<sub>0</sub>) signifying the microporous character and type IV (hysteresis above 0.3 P/P<sub>0</sub>) which stands for the presence of mesoporous character of the composite (Figure 2C and D). The calculated BET surface area of NAC is 434.19 m<sup>2</sup> g<sup>-1</sup> (with microspore surface area of 341.12 m<sup>2</sup> g<sup>-1</sup>) and that of C/SnO<sub>2</sub> is 402.19 m<sup>2</sup> g<sup>-1</sup> (having microspore surface area 298.53 m<sup>2</sup> g<sup>-1</sup>). The pore size distribution curve features that both NAC and C/SnO<sub>2</sub> are having pore diameters in the range ~1.8-1.9 nm and ~3.8-3.84 nm respectively suggesting the micro and mesoporous nature of the as-prepared samples (Figure S2E and F). The total pore volume of NAC and C/SnO<sub>2</sub> are 0.206 cm<sup>3</sup> g<sup>-1</sup> and 0.217 cm<sup>3</sup> g<sup>-1</sup>, respectively. The above results convey that C/SnO<sub>2</sub> exhibits almost similar adsorption-desorption behavior like NAC registering that the decoration of SnO<sub>2</sub> on the carbon surface does not contribute towards the porosity generation on the surface of the composite. The

mesoporous nature of the C/SnO<sub>2</sub> surface may play a pivotal role during the electrochemical reactions by providing facile pathway for metal ions.

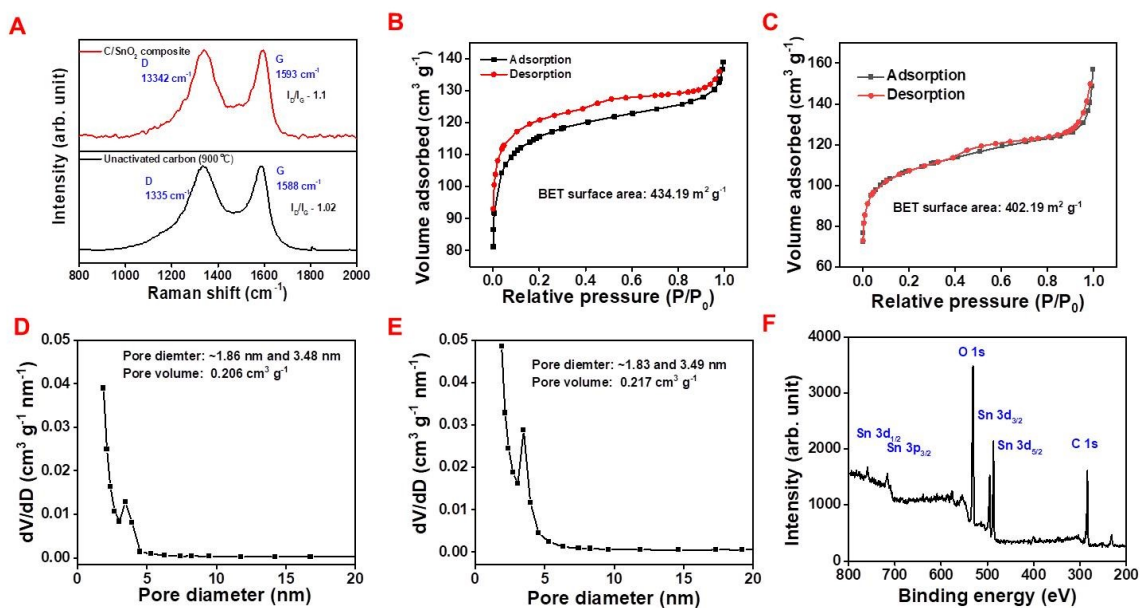

**Figure S2:** (A) Comparative Raman spectra of NAC (black line) and C/SnO<sub>2</sub> composite, N<sub>2</sub> adsorption-desorption isotherm (B) non-activated carbon (NAC) and (C) C/SnO<sub>2</sub> composite. Pore-size distribution curve of (D) non-activated carbon (NAC) and (E) C/SnO<sub>2</sub> composite. (F) Wide-range X-ray photo electron spectroscopy of C/SnO<sub>2</sub> composite,

### Electrochemical analysis:

The P-C/SnO<sub>2</sub> composite delivers specific discharge and charge capacity of 1666 and 647 mA h g<sup>-1</sup> having ICE of 39% at the specific current of 25 mA g<sup>-1</sup> (Figure S3A). However, the capacity decreases abruptly in the 2<sup>nd</sup> and 3<sup>rd</sup> cycles where the calculated discharge/charge capacity values are 690/484 and 505/392 mA h g<sup>-1</sup> having CE of 69% and 78%, respectively (Figure S3A). Cyclic stability of this as-prepared composite has also been studied at 200 mA g<sup>-1</sup> where after 50 charge-discharge cycles the charge capacity decreases from 323 to 70 mA h g<sup>-1</sup> which is only 22% of its initial capacity (Figure S3B).

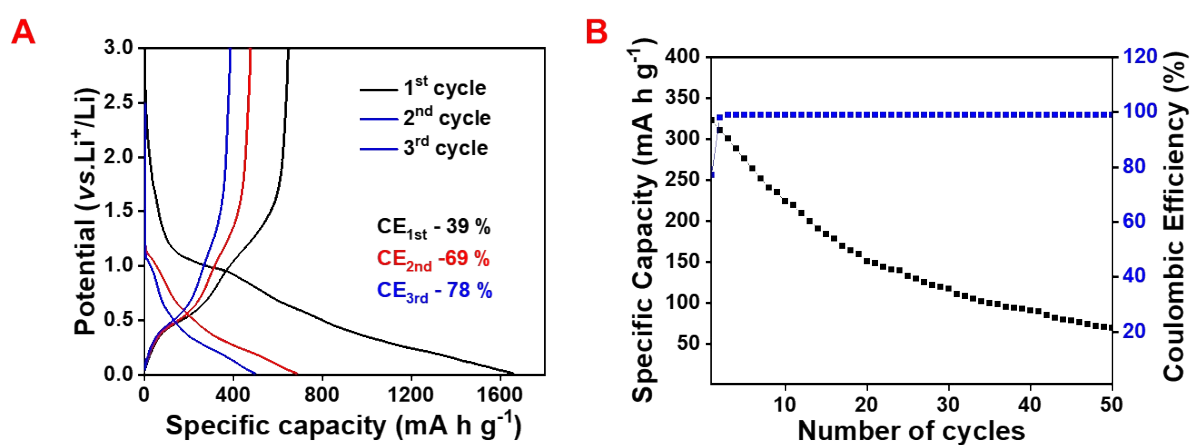

**Fig. S3:** (A) Charge-discharge profile and (B) cyclic stability of P-C/SnO<sub>2</sub> composite.

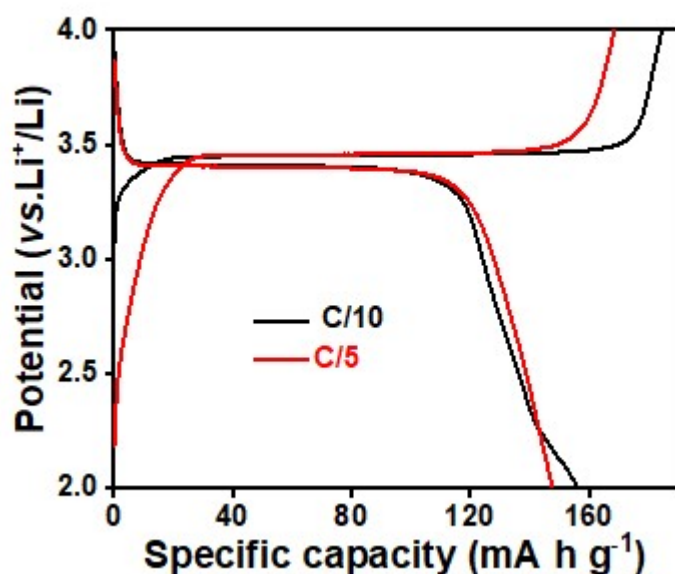

**Fig. S4:** Charge-discharge profile of C/LFP.

From the comparative EIS plot (Figure S5A) no significant change in  $R_s$  value is observed, but  $R_{CT}$  value is found to have increased significantly after the 100 charge-discharge cycles.  $R_{CT}$  value increases from 48 ohm to 447 ohm after 100 charge-discharge cycles complying with the low stability and rate of C/SnO<sub>2</sub> as NIB. The calculated diffusion co-efficient values of Na-ions for C/SnO<sub>2</sub> are relatively low which are  $3.16 \times 10^{-16} \text{ m}^2 \text{ s}^{-1}$  and  $4.85 \times 10^{-16} \text{ m}^2 \text{ s}^{-1}$  before and after the 100 charge-discharge cycles (Figure S5B and C).

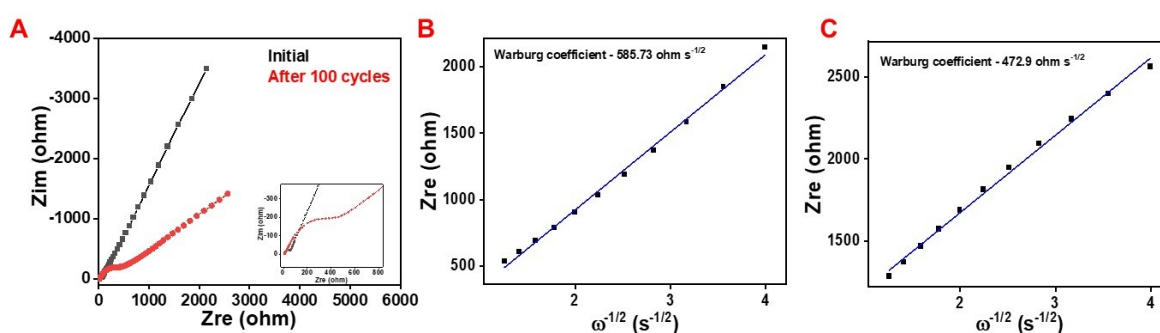

**Fig. S5:** Electrochemical performance of C/SnO<sub>2</sub> as Na-ion battery anode; (A) EIS curve before and after the 100 charge-discharge cycles, (B & C) real impedance ( $Z_{re}$ ) vs angular frequency ( $\omega$ ) plot before and after the 100 charge-discharge cycles, respectively.

**Table 1:** Comparative electrochemical performance of different reported carbon-SnO<sub>2</sub> composite as Li-ion battery anode with the as-prepared C/SnO<sub>2</sub> composite.

| <b>Composite</b>                       | <b>Synthesis procedure</b>                    | <b>Specific capacity/mA hg<sup>-1</sup><br/>(current/ mA g<sup>-1</sup>)</b> | <b>ICE</b> | <b>Reference</b> |
|----------------------------------------|-----------------------------------------------|------------------------------------------------------------------------------|------------|------------------|
| SnO <sub>2</sub> /carbon               | Wet-chemical followed by sacrificial template | 697 (100)                                                                    | 49%        | 1                |
| Core shell SnO <sub>2</sub> /C         | Hydrothermal                                  | 890 (100)                                                                    | 67%        | 2                |
| Carbon/SnO <sub>2</sub>                | Calcination                                   | 837 (50)                                                                     | 53.4%      | 3                |
| SnO <sub>2</sub> /carbon nanofibre     | Sol-gel                                       | 732 (100)                                                                    | 52.5%      | 4                |
| Carbon coated SnO <sub>2</sub>         | Hydrothermal                                  | 948 (120)                                                                    | 71%        | 5                |
| Carbon supported SnO <sub>2</sub>      | Electrodeposition                             | 700 (100)                                                                    | 53%        | 6                |
| C/SnO <sub>2</sub>                     | Annealing                                     | 955 (200)                                                                    | 63%        | 7                |
| C/SnO <sub>2</sub>                     | Electrospinning followed by annealing         | 1124 (200)                                                                   | 72.9%      | 8                |
| SnO <sub>2</sub> /C nanospheres        | Hydrothermal                                  | 1197 (100)                                                                   | 45%        | 9                |
| N-doped carbon coated SnO <sub>2</sub> | Hydrolysis                                    | 1082 (100)                                                                   | 75%        | 10               |
| C@SnO <sub>2</sub> @C                  | Hydrothermal                                  | 853 (200)                                                                    | 58%        | 11               |
| C/SnO <sub>2</sub> nanowires           | Wet chemical dispersion followed by annealing | 868 (25)<br>608 (100)                                                        | 52%        | This work        |

**Table S2:** Calculated electrochemical impedance parameters of C/SnO<sub>2</sub> as LIB anode at different stages of the charge-discharge cycles.

|                                   | <b>R<sub>S</sub></b><br><b>(ohm)</b> | <b>R<sub>CT</sub></b><br><b>(ohm)</b> | <b>Warburg</b><br><b>coefficient</b><br><b>(ohm s<sup>-1/2</sup>)</b> | <b>Diffusion</b><br><b>constant</b><br><b>(cm<sup>2</sup> s<sup>-1</sup>)</b> |
|-----------------------------------|--------------------------------------|---------------------------------------|-----------------------------------------------------------------------|-------------------------------------------------------------------------------|
| <b>Initial</b>                    | 2.9                                  | 62.1                                  | 89.2                                                                  | 1.36×10 <sup>-14</sup>                                                        |
| <b>After 100</b><br><b>cycles</b> | 6.7                                  | 32.6                                  | 71.47                                                                 | 2.12×10 <sup>-14</sup>                                                        |
| <b>After 500</b><br><b>cycles</b> | 7.4                                  | 48.3                                  | 27.13                                                                 | 1.47×10 <sup>-13</sup>                                                        |

## References:

- 1 W. Wang, P. Li, Y. Fu and X. Ma, *J. Power Sources*, 2013, **238**, 464–468.
- 2 J. Liu, W. Li and A. Manthiram, *Chem. Commun.*, 2010, **46**, 1437–1439.
- 3 Y. Li, Q. Meng, J. Ma, C. Zhu, J. Cui, Z. Chen, Z. Guo, T. Zhang, S. Zhu and D. Zhang, *ACS Appl. Mater. Interfaces*, 2015, **7**, 11146–11154.
- 4 M. Wang, S. Li, Y. Zhang and J. Huang, *Chem. Eur. J.*, 2015, **21**, 16195–16202.
- 5 X. W. Lou, J. S. Chen, P. Chen and L. A. Archer, *Chem. Mater.*, 2009, **21**, 2868–2874.
- 6 R. Hu, H. Zhang, J. Liu, D. Chen, L. Yang, M. Zhu and M. Liu, *J. Mater. Chem. A*, 2015, **3**, 15097–15107.
- 7 H. Wang, G. Jiang, X. Tan, J. Liao, X. Yang, R. Yuan and Y. Chai, *Inorg. Chem. Commun.*, 2018, **95**, 67–72.
- 8 Q. Wang, J. Xu, G. Shen, Y. Guo, X. Zhao, Y. Xia, H. Sun, P. Hou, W. Xie and X. Xu, *Electrochim. Acta*, 2019, **297**, 879–887.
- 9 X. Ao, J. Jiang, Y. Ruan, Z. Li, Y. Zhang, J. Sun and C. Wang, *J. Power Sources*, 2017, **359**, 340–348.
- 10 Y. Hong, W. Mao, Q. Hu, S. Chang, D. Li, J. Zhang, G. Liu and G. Ai, *J. Power Sources*, 2019, **428**, 44–52.
- 11 B. Cao, Z. Liu, C. Xu, J. Huang, H. Fang and Y. Chen, *J. Power Sources*, 2019, **414**, 233–241.
